# Supplementary material for: A meta-approach for improving the prediction and the functional annotation of ortholog groups
Source: PubMed Central journal article supplement (PMC4240552; doi:10.1186/1471-2164-15-s6-s16), 2014-10-17

**A**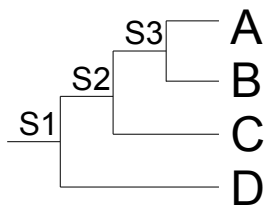**B**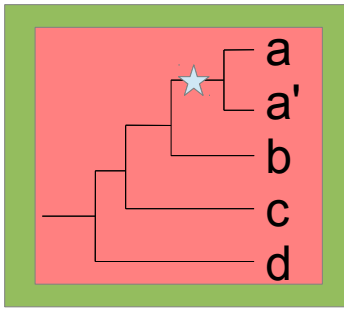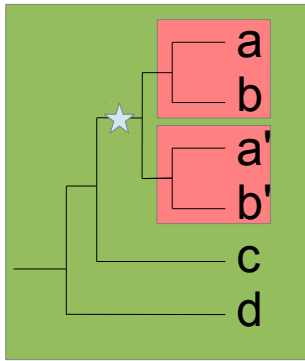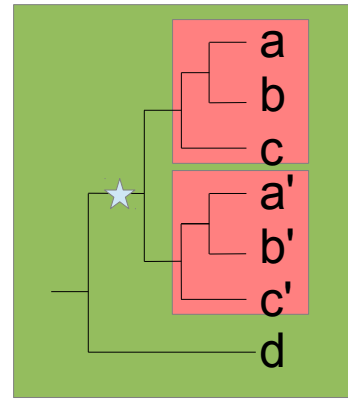**C**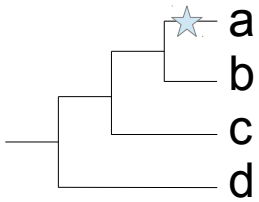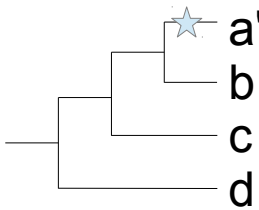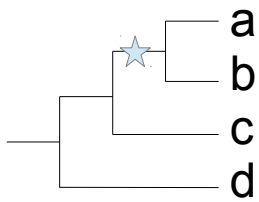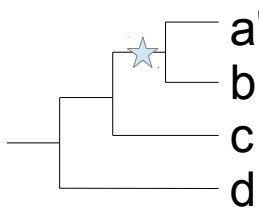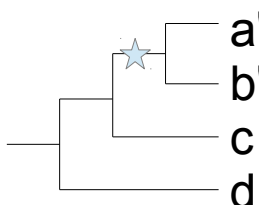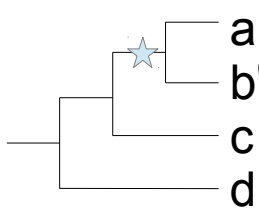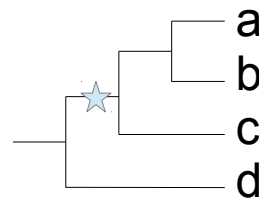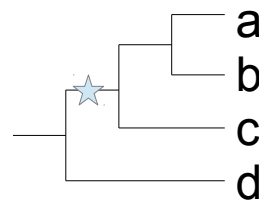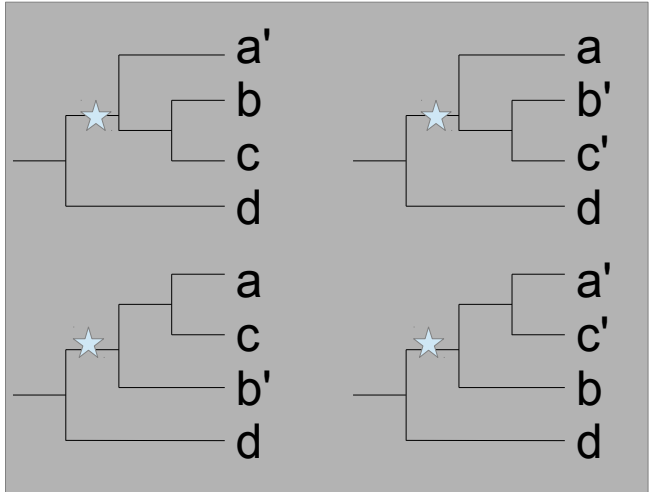

Supplement: 1471-2164-15-S6-S16-S1.pdf [file 1471-2164-15-S6-S16-S1.pdf]
