# Supplementary material for: A meta-approach for improving the prediction and the functional annotation of ortholog groups
Source: PubMed Central journal article supplement (PMC4240552; doi:10.1186/1471-2164-15-s6-s16), 2014-10-17
Supplement: 1471-2164-15-S6-S16-S3.pdf [file 1471-2164-15-S6-S16-S3.pdf]

|                    |               | BRH    | Inparanoid | OrthoMCL | Phylogeny | Meta-approach |
|--------------------|---------------|--------|------------|----------|-----------|---------------|
| # Identical groups | BRH           | 25384  |            |          |           |               |
|                    | Inparanoid    | 7543   | 21342      |          |           |               |
|                    | OrthoMCL      | 5272   | 7268       | 17524    |           |               |
|                    | Phylogeny     | 4082   | 3260       | 2696     | 17944     |               |
|                    | Meta-approach | 3322   | 4705       | 4463     | 2654      | 14771         |
| # Proteins         |               | 140561 | 163850     | 155982   | 124206    | 187902        |
